# Supplementary material for: The Golgi apparatus acts as a platform for TBK1 activation after viral RNA sensing
Source: Springer Nature journal article supplement (doi:10.1186/s12915-016-0292-z), 2016-08-18

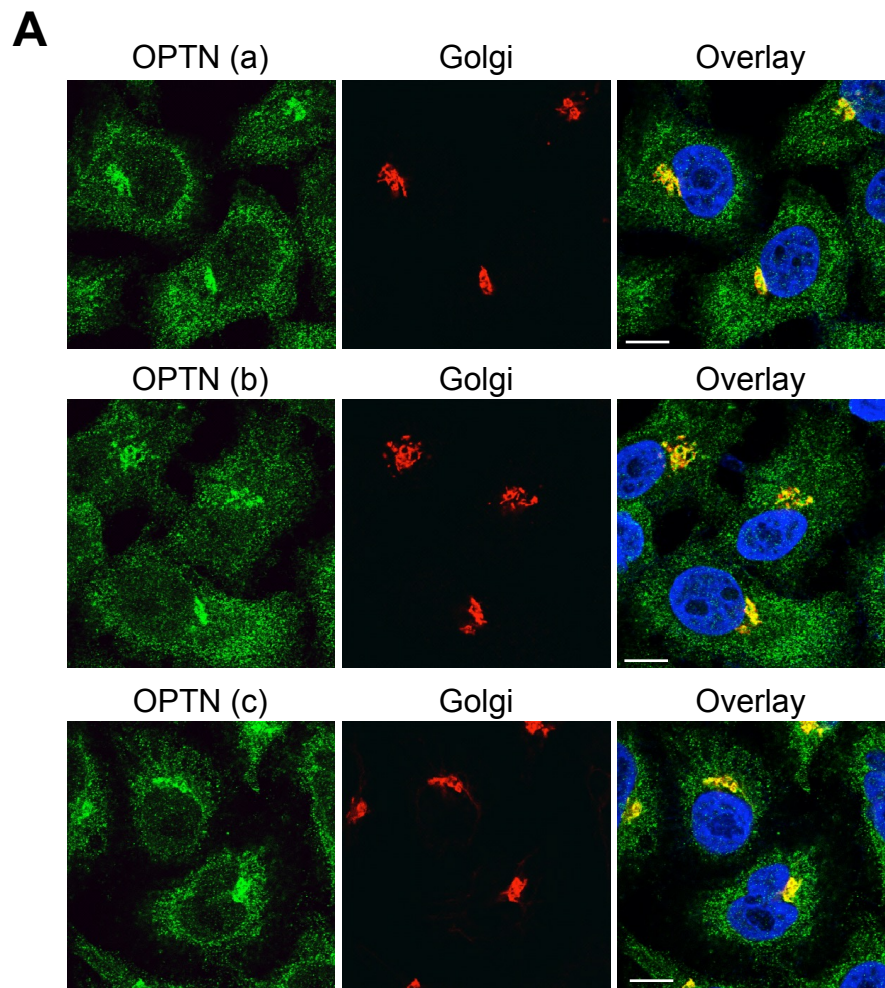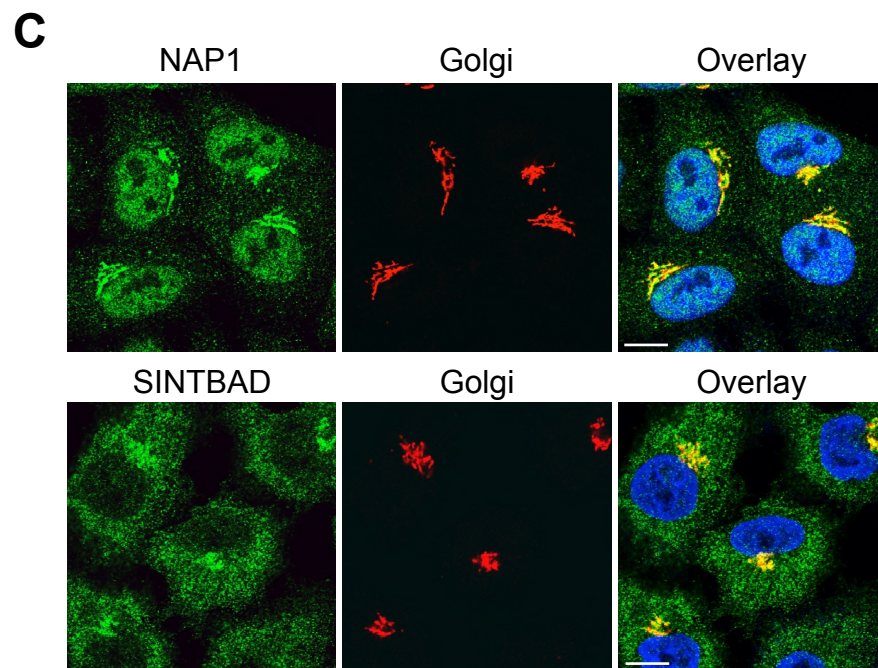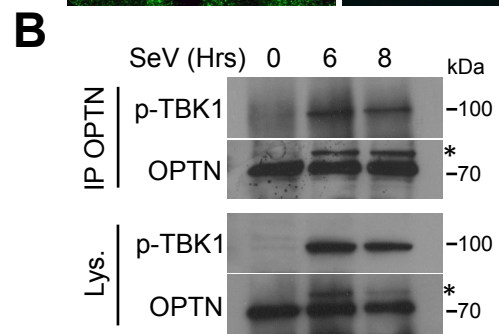

Supplement: MOESM5 [file 12915_2016_292_MOESM5_ESM.pdf]
